# Supplementary material for: Newly Designed Cysteine-Based Self-Assembling Prodrugs for Sepsis Treatment
Source: MDPI journal article supplement (doi:10.3390/pharmaceutics15061775), 2023-06-20
Supplement: s1 [file s1]

## **Supplementary Information**

## Table of Contents

|                                                                                                                 |    |
|-----------------------------------------------------------------------------------------------------------------|----|
| <b>Supporting Data</b>                                                                                          | S3 |
| <b>Figure S1.</b> GPC curves and $^1\text{H}$ NMR spectra of <b>P2(SS)</b> and <b>P3(SS)</b>                    | S3 |
| <b>Figure S2.</b> GPC curves and $^1\text{H}$ NMR spectra of <b>P2(SH)</b> and <b>P3(SH)</b>                    | S4 |
| <b>Figure S3.</b> TEM images of Nano <sup>Cys(Bu)</sup> ( <b>P2</b> ) and Nano <sup>Cys(Bu)</sup> ( <b>P3</b> ) | S5 |
| <b>Figure S4.</b> The effect of the polymer concentration on the formation of Nano <sup>Cys(Bu)</sup>           | S6 |
| <b>Figure S5.</b> The effect of pH on the formation of Nano <sup>Cys(Bu)</sup>                                  | S7 |
| <b>Table S1.</b> Synthesis and Characterization of PEG and PCys-Based Block Copolymers                          | S8 |

## Supporting Data

(a) GPC: P2(SS)

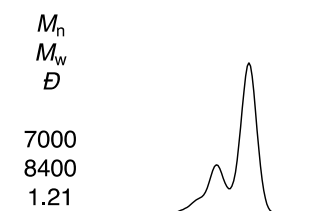

(b)  $^1\text{H}$  NMR: P2(SS)

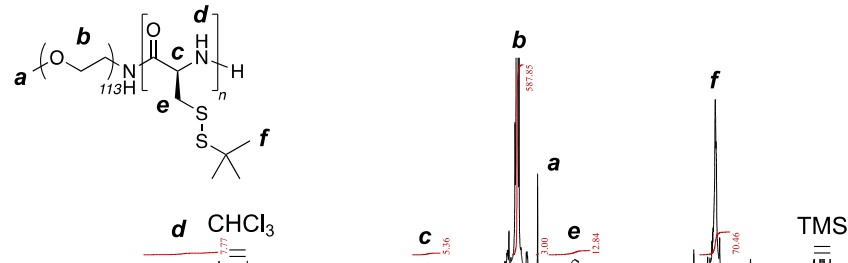

(c) GPC: P3(SS)

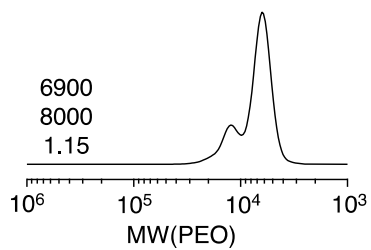

(d)  $^1\text{H}$  NMR: P3(SS)

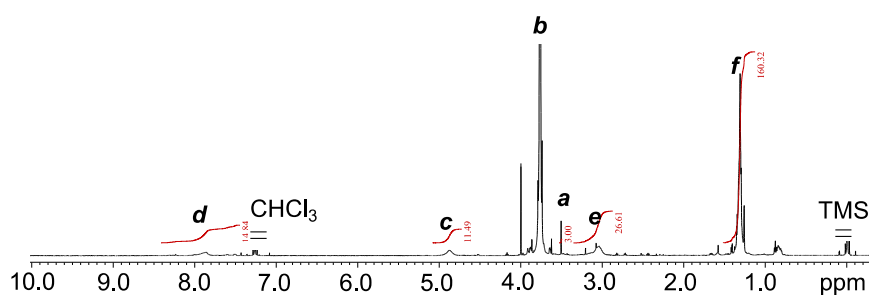

**Figure S1.** GPC curves and  $^1\text{H}$  NMR spectra (600 MHz; [polymer] = 5 mg/mL in  $\text{CDCl}_3/\text{TFA}$  = 15/1 (v/v)) of PEG-*block*-PCys(*St*Bu) (a–b, **P2(SS)**; c–d, **P3(SS)**).

(a) GPC: P2(SH)

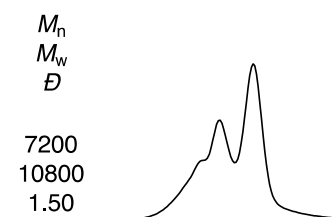

(b)  $^1\text{H}$  NMR: P2(SH)

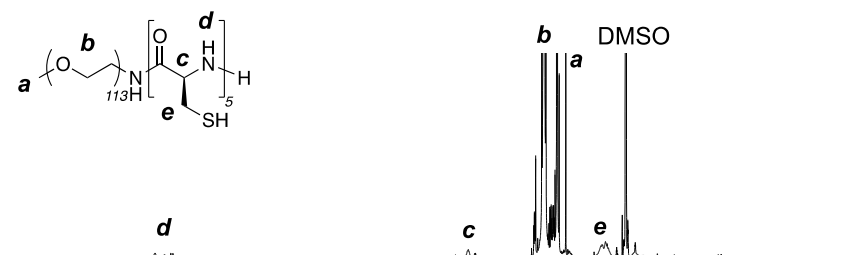

(c) GPC: P3(SH)

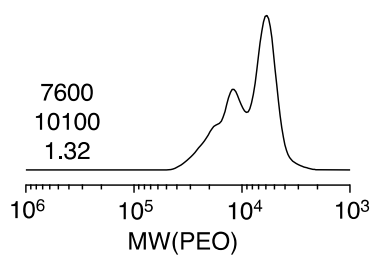

(d)  $^1\text{H}$  NMR: P3(SH)

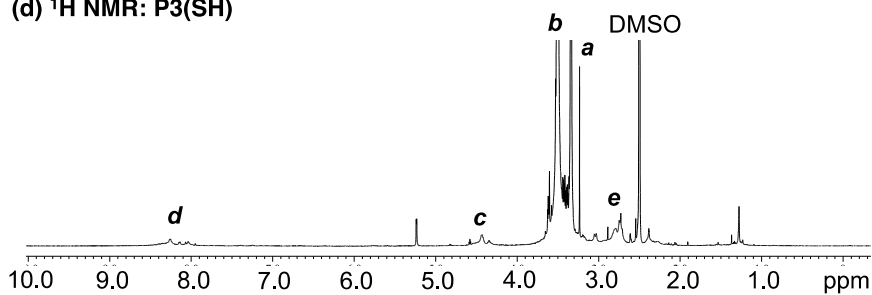

**Figure S2.** GPC curves and  $^1\text{H}$  NMR spectra (600 MHz; [polymer] = 5 mg/mL in DMSO- $d_6$ ) of PEG-*block*-PCys (a–b, P2(SH); c–d, P3(SH)).

**(a) TEM: Nano<sup>Cys(Bu)</sup>(P2)**

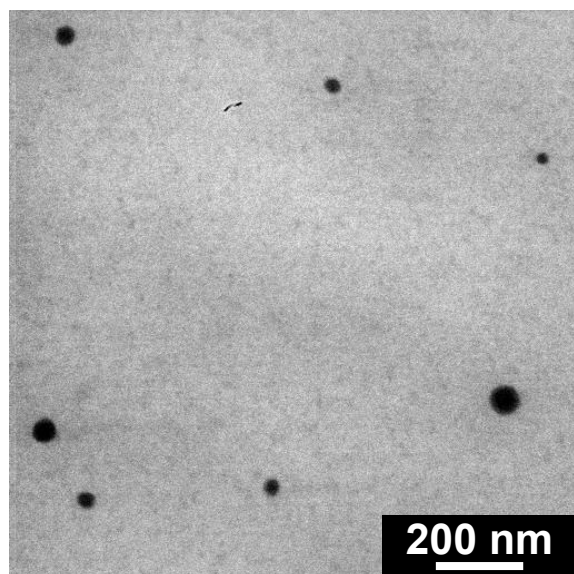

**(b) TEM: Nano<sup>Cys(Bu)</sup>(P3)**

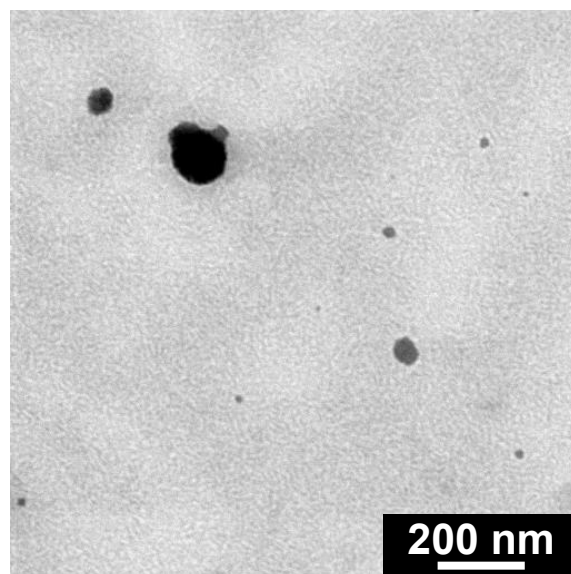

**Figure S3.** TEM images of (a) Nano<sup>Cys(Bu)</sup>(P2) and (b) Nano<sup>Cys(Bu)</sup>(P3) cast on the carbon grid from the aqueous solutions and stained by phosphotungstic acid.

**(a) Nano<sup>Cys(Bu)</sup>(P1),  $g^{(2)}(\tau) - 1$** 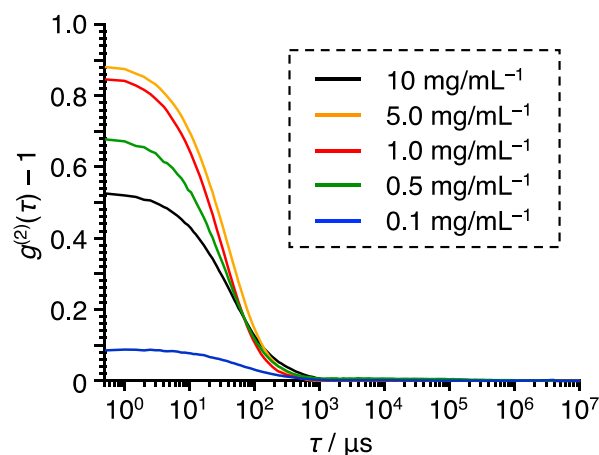**(b) Nano<sup>Cys(Bu)</sup>(P1), intensity**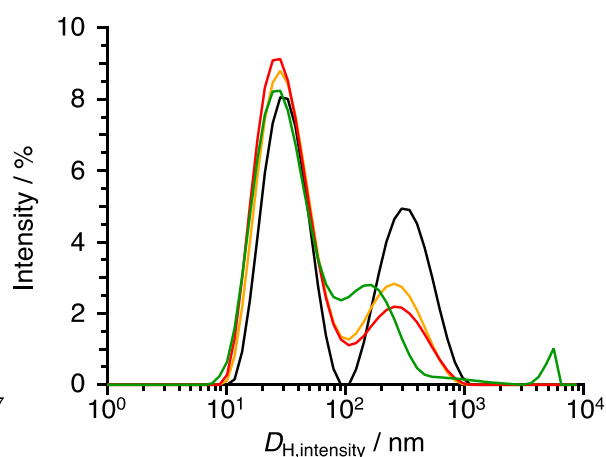**(c) Nano<sup>Cys(Bu)</sup>(P2),  $g^{(2)}(\tau) - 1$** 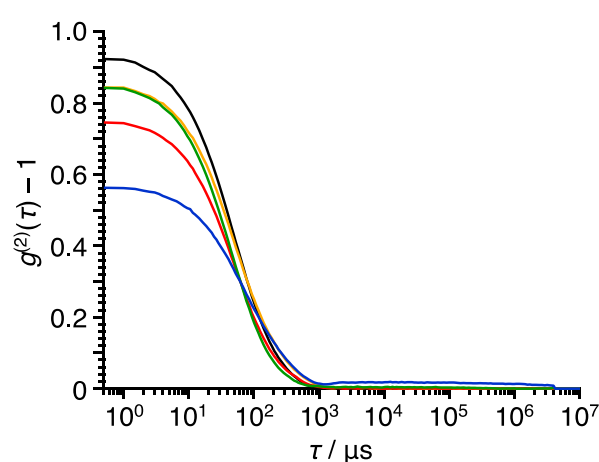**(d) Nano<sup>Cys(Bu)</sup>(P2), intensity**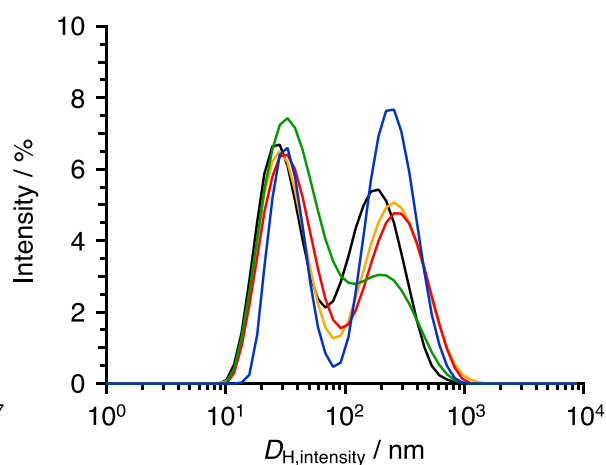**(e) Nano<sup>Cys(Bu)</sup>(P3),  $g^{(2)}(\tau) - 1$** 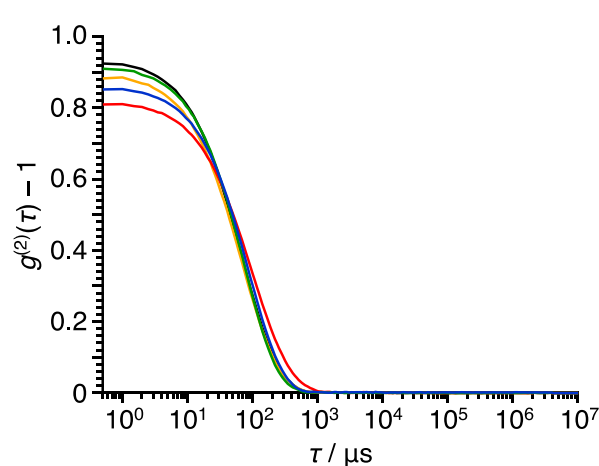**(f) Nano<sup>Cys(Bu)</sup>(P3), intensity**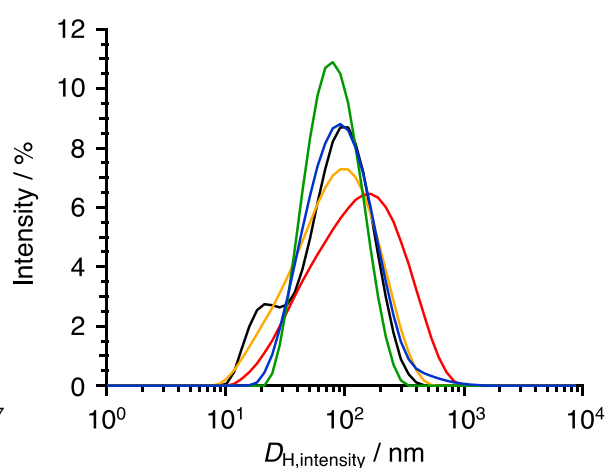

**Figure S4.** Effect of the polymer concentration on the micelle formation in water (a–b, Nano<sup>Cys(Bu)</sup>(P1); c–d, Nano<sup>Cys(Bu)</sup>(P2); e–f, Nano<sup>Cys(Bu)</sup>(P3)). (a, c, e) The autocorrelation functions ( $g^{(2)}(\tau) - 1$ ) and (b, d, f) the intensity distributions of the hydrodynamic diameter ( $D_{H,\text{intensity}}$ ) were characterized by DLS measurements at 37 °C ([polymer] = (blue) 0.1, (green) 0.5, (red) 1.0, (orange) 5.0, and (black) 10 mg/mL).

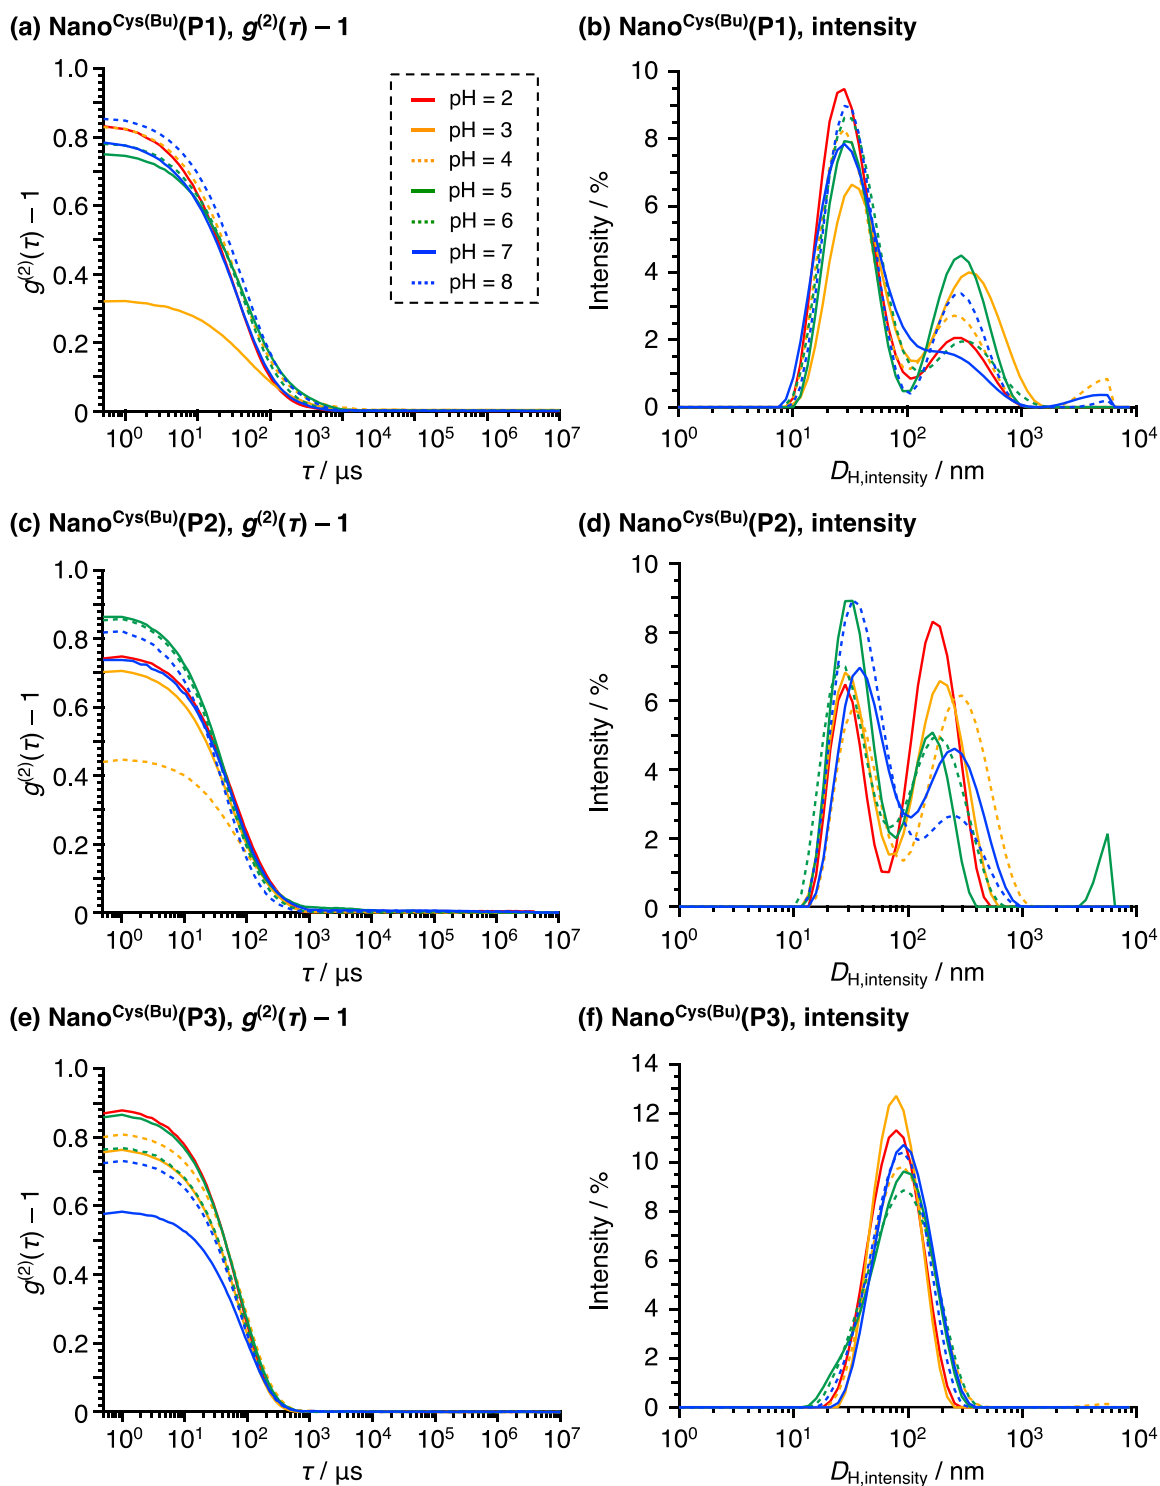

**Figure S5.** Effect of pH on the micelle size in water (a–b, Nano<sup>Cys(Bu)</sup>(P1); c–d, Nano<sup>Cys(Bu)</sup>(P2); e–f, Nano<sup>Cys(Bu)</sup>(P3)). (a, c, e) The autocorrelation functions ( $g^{(2)}(\tau) - 1$ ) and (b, d, f) the intensity distributions of the hydrodynamic diameter ( $D_{H,\text{intensity}}$ ) were characterized by DLS measurements at 37 °C ([polymer] = 1.0 mg/mL; incubation time = 1 h; incubation temperature = 37 °C; pH = (red solid) 2, (orange solid) 3, (orange dash) 4, (green solid) 5, (green dash) 6, (blue solid) 7, (blue dash) 8).

**Table S1.** Synthesis and Characterization of PEG and PCys-Based Block Copolymers<sup>a</sup>

| Code      | Side Chains | NCA / mM | PEG-NH <sub>2</sub> / mM | <i>n</i> <sup>b</sup> | Time / h | Conversion <sup>c</sup> / % | <i>M<sub>n</sub></i> <sup>d</sup> (GPC) | <i>D</i> <sup>d</sup> (GPC) | <i>n</i> <sub>obsd.</sub> <sup>e</sup> | <i>M<sub>n</sub></i> <sup>e</sup> (NMR) | <i>D<sub>H,intensity</sub></i> <sup>f</sup> / nm | <i>D<sub>H,volume</sub></i> <sup>f</sup> / nm |
|-----------|-------------|----------|--------------------------|-----------------------|----------|-----------------------------|-----------------------------------------|-----------------------------|----------------------------------------|-----------------------------------------|--------------------------------------------------|-----------------------------------------------|
| <b>P1</b> | SS          | 250      | 42.5                     | 5                     | 96       | 85                          | 6600                                    | 1.24                        | 5                                      | 6000                                    | —                                                | —                                             |
|           | SH          | —        | —                        |                       | —        | —                           | 8200                                    | 1.74                        |                                        | 5500                                    | —                                                | —                                             |
|           | Bu          | —        | —                        |                       | —        | —                           | 7600                                    | 1.36                        |                                        | 5900                                    | 34 / 295                                         | 20                                            |
| <b>P2</b> | SS          | 250      | 21.2                     | 10                    | 95       | 84                          | 7000                                    | 1.21                        | 8                                      | 6500                                    | —                                                | —                                             |
|           | SH          | —        | —                        |                       | —        | —                           | 7200                                    | 1.50                        |                                        | 5800                                    | —                                                | —                                             |
|           | Bu          | —        | —                        |                       | —        | —                           | 7500                                    | 1.35                        |                                        | 6400                                    | 37 / 300                                         | 26                                            |
| <b>P3</b> | SS          | 250      | 10.6                     | 20                    | 96       | 84                          | 6900                                    | 1.15                        | 18                                     | 8400                                    | —                                                | —                                             |
|           | SH          | —        | —                        |                       | —        | —                           | 7600                                    | 1.32                        |                                        | 6800                                    | —                                                | —                                             |
|           | Bu          | —        | —                        |                       | —        | —                           | 7300                                    | 1.29                        |                                        | 8100                                    | 166                                              | 39                                            |

<sup>a</sup> **P1(SS)** – **P3(SS)**: [NCA-Cys(*St*Bu)] / [PEG-NH<sub>2</sub>] = 250 / 42.5 (**P1(SS)**), 21.2 (**P2(SS)**), or 10.6 (**P3(SS)**) mM in DMF at 45 °C. <sup>b</sup> Targeted degree of polymerization (DP) at 85% monomer conversion: *n* = 0.85 × [NCA-Cys(*St*Bu)]/[PEG-NH<sub>2</sub>]. <sup>c</sup> Monomer conversion determined by <sup>1</sup>H NMR. <sup>d</sup> Number-average molecular weight (*M<sub>n</sub>*) and distribution (*D*) determined by gel permeation chromatography (GPC) in DMF ([LiBr] = 10 mM) with poly(ethylene oxide) (PEO) standards. <sup>e</sup> The observed DP (*n*<sub>obsd.</sub>) was determined using PEG-*block*-PCys(*St*Bu) by <sup>1</sup>H NMR in CDCl<sub>3</sub>/TFA = 15/1 (v/v) ([polymer] = 5 mg/mL). The number-average molecular weight (*M<sub>n</sub>*(NMR)) was determined by the observed DP (*n*<sub>obsd.</sub>). <sup>f</sup> The intensity- and volume-average hydrodynamic diameter (*D<sub>H,intensity</sub>*, *D<sub>H,volume</sub>*) of Nano<sup>Cys(Bu)</sup>s were determined by DLS in water at 37 °C ([polymer] = 1.0 mg/mL).
